# Supplementary material for: Success Rates of Adhesive Materials in Atraumatic Restorative Treatment (ART) Restorations for Primary and Permanent Molars: A Systematic Review and Network Meta-Analysis
Source: Research Square preprint supplement (doi:10.21203/rs.3.rs-7398633/v1), 2025-09-03
Supplement: Supplementary file 1 [file 278b2de420a52b901d5e1785.docx]

**Supplementary 2**. Reasons why the articles that were read in full were excluded from the qualitative and quantitative analysis, considering the exclusion criteria.

| Article | Authors | Reason of excluded |
| --- | --- | --- |
| 2 year survival and cost analysis of occlusoproximal ART restorations using encapsulated glass ionomer cement in primary molars: a randomized controlled trial | Garbim et al., 2024 | Same Material Comparator |
| A 2 year clinical study of two glass ionomer cements used in the atraumatic restorative treatment (ART) technique | Ho et al., 1999 | Same Material Comparator |
| A clinical evaluation of two glass ionomer cements in primary molars using atraumatic restorative treatment technique in India: 1 year follow up. | Deepaet al., 2010 | Same Material Comparator |
| ART restorations for occluso proximal cavities in primary molars: a two year survival and cost analysis of an RCT comparing two GIC brands | Olegário et al., 2022 | Same Material Comparator |
| Atraumatic restorative treatment ART in early childhood caries in babies: 4 years of randomized clinical trial | Faustino-Silva et al., 2019 | Same Material Comparator |
| Bilayer technique and nano filled coating increase success of approximal ART restorations: a randomized clinical trial | Hesse et al., 2016 | Same Material Comparator |
| Clinical evaluation of three caries removal approaches in primary teeth: a randomised controlled trial | Phonghanyudh et al., 2012 | Same Material Comparator |
| Clinical investigation of a high strength glass ionomer restorative used with the ART technique in Wuhan, China: one year results. | Luo et al., 1999 | Same Material Comparator |
| Clinical investigation of two glass ionomer restoratives used with the atraumatic restorative treatment approach in China: two years results. | Lo et al., 2001 | Same Material Comparator |
| Clinical performance during 48 months of two current glass ionomer restorative systems with coatings: a randomized clinical trial in the field | Klinke et al., 2016 | Same Material Comparator |
| Does low cost GIC have the same survival rate as high viscosity GIC in atraumatic restorative treatments? A RCT | Moura et al., 2020 | Same Material Comparator |
| Effects of oral hygiene, residual caries and cervical Marginal gaps on the survival of proximal atraumatic restorative treatment approach restorations | Kemoli et al., 2018 | Same Material Comparator |
| Influence of the experience of operator and assistant on the survival rate of proximal ART restorations: two year results | Kemoli et al., 2009 | Same Material Comparator |
| Is it worth using low cost glass ionomer cements for occlusal ART restorations in primary molars? 2 year survival and cost analysis of a Randomized clinical trial | Olegário et al., 2020 | Same Material Comparator |
| Low cost GICs reduce survival rate in occlusal ART restorations in primary molars after one year: A RCT | Olegário et al., 2016 | Same Material Comparator |
| One year survival of occlusal ART restorations in primary molars placed with and without cavity conditioner | Yassen, 2009 | Same Material Comparator |
| One year Survival Rate of Ketac Molar versus Vitro Molar for Occlusoproximal ART Restorations: a RCT | de Brito et al., 2017 | Same Material Comparator |
| Pulp vitality of primary molars with deep caries treated with ART restorations: 2 year RCT | Silva et al., 2022 | Same Material Comparator |
| Randomised clinical trial of Class II ART restoration in primary teeth with and without retentive grooves after 12 months | Pesaressiet al., 2024 | Same Material Comparator |
| Randomized clinical trial of encapsulated and hand mixed glass ionomer ART restorations: one year follow up | Freitas et al., 2018 | Same Material Comparator |
| Short term Clinical and Microbiological Performance of Resin modified Glass Ionomer Cement Containing Chlorhexidine for Atraumatic Restorative Treatment | da Silva et al., 2023 | Same Material Comparator |
| Six year evaluation of the atraumatic restorative treatment approach in permanent tooth Class III restorations | Prakki et al., 2008 | Same Material Comparator |
| Survival of ionomeric restorations with atraumatic restorative treatment in children under 6 years of age | Calderón et al., 2022 | Same Material Comparator |
| Survival of occlusal ART restorations in primary molars placed in school environment and hospital dental setup one year follow up study | Roshan et al., 2011 | Same Material Comparator |
| Survival of occlusal ART restorations using high viscosity glass ionomer with and without chlorhexidine: A 2 year split mouth quadruple blind randomized controlled clinical trial | Mobarak et al., 2019 | Same Material Comparator |
| Survival rate of approximal ART restorations using a two layer technique for glass ionomer insertion | Bonifácio et al., 2013 | Same Material Comparator |
| Survival Rate of Atraumatic Restorative Treatment (ART) Restorations Using a Glass Ionomer Bilayer Technique with a Nanofilled Coating: A Bi center Randomized Clinical Trial | Hesse et al., 2016 | Same Material Comparator |
| Survival rate of primary molar restorations is not influenced by hand mixed or encapsulated GIC: 24 months RCT | Oliveira et al., 2021 | Same Material Comparator |
| Survival rates of two atraumatic restorative treatment (ART) types in occlusal carious permanent teeth after two years | Ibiyemi et al., 2011 | Same Material Comparator |
| Ten year survival of ART restorations in permanent posterior teeth | Zanata et al., 2010 | Same Material Comparator |
| The effects of ambient temperature and mixing time of glass ionomer cement material on the survival rate of proximal ART restorations in primary molars | Kemoli, 2014 | Same Material Comparator |
| Two year survival rates of proximal atraumatic restorative treatment restorations in relation to glass ionomer cements and Postrestoration meals consumed | Kemoli et al., 2011 | Same Material Comparator |
| Clinical evaluation of multisurface ART restorations | Cefaly et al., 2005 | Less than 12 months of follow-up |
| Clinical evaluation of the ART technique using high density and resin modified glass ionomer cements | de Souza et al., 2003 | Less than 12 months of follow-up |
