# Supplementary material for: Success Rates of Adhesive Materials in Atraumatic Restorative Treatment (ART) Restorations for Primary and Permanent Molars: A Systematic Review and Network Meta-Analysis
Source: Research Square preprint supplement (doi:10.21203/rs.3.rs-7398633/v1), 2025-09-03
Supplement: Supplementary file 2 [file 73c9df17f458534f8882b276.docx]

**Supplementary 1**. search strategies for each database

| PubMed | ((Success OR Survival OR Longevity) AND (ART OR “atraumatic restorative treatment” OR “atraumatic restorative procedure”) AND (amalgam OR resin* OR composite* OR composite resin* OR resin composite* OR compomer* OR “polyacid modified composite resin” OR “polyacid-modified composite resin” OR “glass ionomer cement” OR “glass-ionomer cement” OR GIC)) |
| --- | --- |
| Scopus | TITLE-ABS-KEY ( ( success OR survival OR longevity ) AND ( art OR "atraumatic restorative treatment" OR "atraumatic restorative procedure" ) AND ( amalgam OR resin* OR composite* OR composite AND resin* OR resin AND composite* OR compomer* OR "polyacid modified composite resin" OR "polyacid-modified composite resin" OR "glass ionomer cement" OR "glass-ionomer cement" OR gic ) ) |
| Web of Science | ((Success OR Survival OR Longevity) AND (ART OR “atraumatic restorative treatment” OR “atraumatic restorative procedure”) AND (amalgam OR resin* OR composite* OR composite resin* OR resin composite* OR compomer* OR “polyacid modified composite resin” OR “polyacid-modified composite resin” OR “glass ionomer cement” OR “glass-ionomer cement” OR GIC)) |
| Embase | (success OR survival OR longevity) AND (art OR 'atraumatic restorative treatment' OR 'atraumatic restorative procedure') AND (((amalgam OR resin* OR composite* OR composite) AND resin* OR resin) AND composite* OR compomer* OR 'polyacid modified composite resin' OR 'polyacid-modified composite resin' OR 'glass ionomer cement' OR 'glass-ionomer cement' OR gic) |
| ProQuest | ((Success OR Survival OR Longevity) AND ("atraumatic restorative treatment" OR "atraumatic restorative procedure") AND (amalgam OR resin* OR composite* OR composite resin* OR resin composite* OR compomer* OR "polyacid modified composite resin" OR "polyacid-modified composite resin" OR "glass ionomer cement" OR "glass-ionomer cement" OR GIC)) |
